# Supplementary material for: Prokaryotic Communities in the Thalassohaline Tuz Lake, Deep Zone, and Kayacik, Kaldirim and Yavsan Salterns (Turkey) Assessed by 16S rRNA Amplicon Sequencing
Source: MDPI journal article supplement (doi:10.3390/microorganisms9071525), 2021-07-17
Supplement: s1 [file s1]

**Table S1.** Environmental parameters and physico-chemical data of the 30 brine samples collected from Tuz Lake (TL1A to TL7B), Deep Zone (TL8A to TL9B), and Kayacik (KYS1A to KYS2B), Kaldirim (KS1A to KS2B) and Yavsan (YS1A to YS2B) salterns.

| Sample                  | Latitude        | Longitude       | Temperature<br>(°C) | pH  | Salinity<br>(%) | Na <sup>+</sup><br>(mg L <sup>-1</sup> ) | K <sup>+</sup><br>(mg L <sup>-1</sup> ) | Mg <sup>2+</sup><br>(mg L <sup>-1</sup> ) | Ca <sup>2+</sup><br>(mg L <sup>-1</sup> ) | Cl <sup>-</sup><br>(mg L <sup>-1</sup> ) |
|-------------------------|-----------------|-----------------|---------------------|-----|-----------------|------------------------------------------|-----------------------------------------|-------------------------------------------|-------------------------------------------|------------------------------------------|
| <b>Tuz Lake</b>         |                 |                 |                     |     |                 |                                          |                                         |                                           |                                           |                                          |
| TL1A                    | 39° 00' 40.0" N | 33° 24' 53.2" E | 25                  | 7.2 | 34              | 74000                                    | 11025                                   | 22859                                     | 186                                       | 179932                                   |
| TL1B                    | 39° 00' 40.0" N | 33° 24' 53.2" E | 25                  | 7.2 | 34              | 75521                                    | 10468                                   | 25296                                     | 174                                       | 182573                                   |
| TL2A                    | 39° 00' 35.2" N | 33° 23' 28.1" E | 25                  | 7.1 | 34              | 79063                                    | 7755                                    | 19381                                     | 155                                       | 196109                                   |
| TL2B                    | 39° 00' 35.2" N | 33° 23' 28.1" E | 25                  | 7.1 | 34              | 79500                                    | 10391                                   | 21950                                     | 199                                       | 197430                                   |
| TL3A                    | 38° 50' 03.3" N | 33° 24' 57.8" E | 27                  | 7.3 | 32              | 92663                                    | 9694                                    | 9728                                      | 230                                       | 209315                                   |
| TL3B                    | 38° 50' 03.3" N | 33° 24' 57.8" E | 27                  | 7.3 | 32              | 96333                                    | 6763                                    | 7981                                      | 295                                       | 214928                                   |
| TL4A                    | 38° 48' 39.0" N | 33° 26' 31.4" E | 27                  | 7.3 | 32              | 91354                                    | 8568                                    | 19559                                     | 197                                       | 203042                                   |
| TL4B                    | 38° 48' 39.0" N | 33° 26' 31.4" E | 27                  | 7.3 | 32              | 85800                                    | 7945                                    | 19863                                     | 180                                       | 199080                                   |
| TL5A                    | 38° 47' 04.3" N | 33° 12' 16.3" E | 25                  | 7.0 | 36              | 74154                                    | 11520                                   | 19699                                     | 158                                       | 181583                                   |
| TL5B                    | 38° 47' 04.3" N | 33° 12' 16.3" E | 25                  | 7.0 | 36              | 74594                                    | 8344                                    | 20373                                     | 140                                       | 180922                                   |
| TL6A                    | 38° 46' 23.1" N | 33° 13' 07.5" E | 25                  | 7.2 | 34              | 85316                                    | 7980                                    | 17351                                     | 213                                       | 199741                                   |
| TL6B                    | 38° 46' 23.1" N | 33° 13' 07.5" E | 25                  | 7.2 | 34              | 82957                                    | 8339                                    | 25332                                     | 201                                       | 198090                                   |
| TL7A                    | 38° 57' 22.3" N | 33° 24' 48.9" E | 22                  | 6.9 | 38              | 62449                                    | 3767                                    | 31221                                     | 134                                       | 173329                                   |
| TL7B                    | 38° 57' 22.3" N | 33° 24' 48.9" E | 22                  | 6.9 | 38              | 63089                                    | 10373                                   | 31424                                     | 130                                       | 174649                                   |
| <b>Deep Zone</b>        |                 |                 |                     |     |                 |                                          |                                         |                                           |                                           |                                          |
| TL8A                    | 38° 48' 27.6" N | 33° 35' 40.7" E | 24                  | 7.4 | 30              | 91878                                    | 4976                                    | 8995                                      | 299                                       | 203372                                   |
| TL8B                    | 38° 48' 27.6" N | 33° 35' 40.7" E | 24                  | 7.4 | 30              | 94129                                    | 13869                                   | 8161                                      | 285                                       | 210636                                   |
| TL9A                    | 38° 45' 54.1" N | 33° 37' 33.5" E | 24                  | 7.4 | 30              | 122228                                   | 5391                                    | 8384                                      | 322                                       | 203042                                   |
| TL9B                    | 38° 45' 54.1" N | 33° 37' 33.5" E | 24                  | 7.4 | 30              | 94000                                    | 5181                                    | 8340                                      | 281                                       | 209645                                   |
| <b>Kayacik saltern</b>  |                 |                 |                     |     |                 |                                          |                                         |                                           |                                           |                                          |
| KYS1A                   | 38° 50' 03.3" N | 33° 25' 01.4" E | 27                  | 7.3 | 32              | 90000                                    | 4821                                    | 12139                                     | 273                                       | 202052                                   |
| KYS1B                   | 38° 50' 03.3" N | 33° 25' 01.4" E | 27                  | 7.3 | 32              | 93688                                    | 6540                                    | 11486                                     | 325                                       | 209645                                   |
| KYS2A                   | 38° 48' 39.0" N | 33° 26' 32.8" E | 27                  | 7.4 | 30              | 95875                                    | 4357                                    | 8246                                      | 462                                       | 211956                                   |
| KYS2B                   | 38° 48' 39.0" N | 33° 26' 32.8" E | 27                  | 7.4 | 30              | 91419                                    | 3118                                    | 6652                                      | 444                                       | 203703                                   |
| <b>Kaldirim saltern</b> |                 |                 |                     |     |                 |                                          |                                         |                                           |                                           |                                          |
| KS1A                    | 39° 00' 37.5" N | 33° 24' 49.9" E | 25                  | 7.3 | 32              | 77865                                    | 10757                                   | 26212                                     | 188                                       | 196439                                   |
| KS1B                    | 39° 00' 37.5" N | 33° 24' 49.9" E | 25                  | 7.3 | 32              | 80319                                    | 3227                                    | 23115                                     | 160                                       | 199741                                   |
| KS2A                    | 39° 00' 36.3" N | 33° 23' 29.9" E | 25                  | 6.9 | 36              | 64649                                    | 11950                                   | 34404                                     | 141                                       | 204033                                   |
| KS2B                    | 39° 00' 36.3" N | 33° 23' 29.9" E | 25                  | 6.9 | 36              | 59980                                    | 9395                                    | 29610                                     | 128                                       | 206344                                   |
| <b>Yavsan saltern</b>   |                 |                 |                     |     |                 |                                          |                                         |                                           |                                           |                                          |
| YS1A                    | 38° 47' 01.7" N | 33° 12' 16.5" E | 25                  | 7.4 | 32              | 91974                                    | 3636                                    | 8333                                      | 416                                       | 204693                                   |
| YS1B                    | 38° 47' 01.7" N | 33° 12' 16.5" E | 25                  | 7.4 | 32              | 88311                                    | 4153                                    | 8370                                      | 491                                       | 202382                                   |
| YS2A                    | 38° 46' 26.6" N | 33° 13' 04.0" E | 25                  | 7.3 | 32              | 90405                                    | 5891                                    | 12756                                     | 335                                       | 203042                                   |
| YS2B                    | 38° 46' 26.6" N | 33° 13' 04.0" E | 25                  | 7.3 | 32              | 88813                                    | 4188                                    | 10000                                     | 375                                       | 203372                                   |

**Table S2.** Mean percentages of phyla composition of brine samples collected from Tuz Lake, Deep Zone, and Kayacik, Kaldirim and Yavsan salterns.

| <b>Sampling Region</b>  | <i>Euryarchaeota</i> | <i>Parvarchaeota</i> | <i>Actinobacteria</i> | <i>Rhodothermaeota</i> | <i>Cyanobacteria</i> | <i>Firmicutes</i> | <i>Lentisphaerae</i> | <i>Proteobacteria</i> | <i>Spirochaetes</i> | <b>Unassigned</b> | <b>Other</b> |
|-------------------------|----------------------|----------------------|-----------------------|------------------------|----------------------|-------------------|----------------------|-----------------------|---------------------|-------------------|--------------|
| <b>Tuz Lake</b>         | 98.09 ± 0.37         | < 0.01               | < 0.01                | 1.54 ± 0.37            | < 0.01               | 0.04 ± 0.02       | 0.02 ± 0.01          | 0.10 ± 0.07           | < 0.01              | 0.18 ± 0.04       | 0.03 ± 0.02  |
| <b>Deep Zone</b>        | 99.84 ± 0.05         | -                    | -                     | 0.09 ± 0.03            | -                    | < 0.01            | -                    | -                     | -                   | 0.07 ± 0.03       | 0.01 ± 0.00  |
| <b>Kayacik Saltern</b>  | 98.74 ± 0.51         | < 0.01               | < 0.01                | 0.89 ± 0.42            | < 0.01               | 0.01 ± 0.00       | < 0.01               | 0.01 ± 0.00           | -                   | 0.36 ± 0.17       | < 0.01       |
| <b>Kaldirim Saltern</b> | 98.72 ± 0.15         | -                    | < 0.01                | 1.11 ± 0.16            | < 0.01               | 0.01 ± 0.00       | 0.01 ± 0.01          | 0.02 ± 0.01           | -                   | 0.14 ± 0.03       | 0.01 ± 0.01  |
| <b>Yavsan Saltern</b>   | 97.49 ± 1.28         | -                    | < 0.01                | 2.13 ± 1.16            | -                    | 0.03 ± 0.02       | < 0.01               | 0.08 ± 0.07           | < 0.01              | 0.26 ± 0.07       | 0.01 ± 0.01  |

**Table S3.** Principal component analysis of physico-chemical parameters.

| Physico-chemical parameters     | Principal components |        |
|---------------------------------|----------------------|--------|
|                                 | Dim1                 | Dim2   |
| Temperature (°C)                | 0.236                | 0.600  |
| pH                              | 0.409                | 0.047  |
| Salinity (%)                    | -0.407               | -0.083 |
| Sodium (mg L <sup>-1</sup> )    | 0.388                | -0.017 |
| Potassium (mg L <sup>-1</sup> ) | -0.232               | 0.648  |
| Magnesium (mg L <sup>-1</sup> ) | -0.399               | 0.111  |
| Calcium (mg L <sup>-1</sup> )   | 0.364                | -0.294 |
| Chloride (mg L <sup>-1</sup> )  | 0.340                | 0.335  |

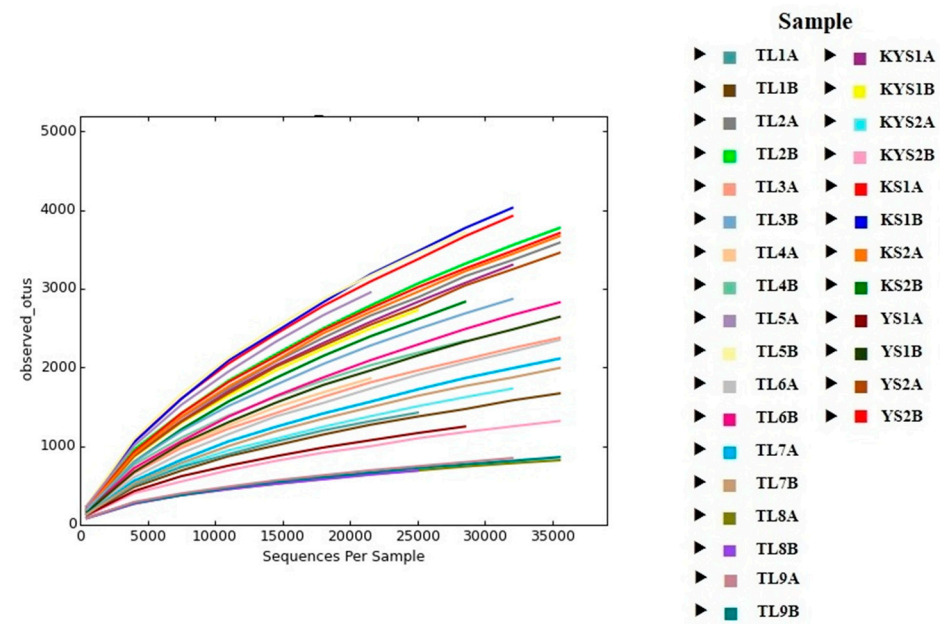

**Figure S1.** Rarefaction curves plotting the number of observed OTUs as a function of the number of sequences.
